# Supplementary material for: Exploring Ln(III)-Ion-Based Luminescent Species as Down-Shifters for Photovoltaic Solar Cells
Source: MDPI journal article supplement (doi:10.3390/ma16145068), 2023-07-18
Supplement: s1 [file s1]

# Exploring Ln(III)-Ion-Based Luminescent Species as Down-Shifters for Photovoltaic Solar Cells

Gabriela Brito-Santos <sup>1</sup>, Cecilio Hernández-Rodríguez <sup>2,\*</sup>, Beatriz Gil-Hernández <sup>3</sup>,  
Joaquín Sanchiz <sup>3</sup>, Inocencio R. Martín <sup>2</sup>, Benjamín González-Díaz <sup>4</sup>  
and Ricardo Guerrero-Lemus <sup>2</sup>

<sup>1</sup> Departamento de Química, Facultad de Ciencias, Universidad de La Laguna (ULL), Avenida Astrofísico Francisco Sánchez S/N, 38206 La Laguna, Tenerife, Spain; gbritosa@ull.edu.es

<sup>2</sup> Departamento de Física, Facultad de Ciencias, Instituto Universitario de Materiales y Nanotecnología, Universidad de La Laguna (ULL), Avenida Astrofísico Francisco Sánchez S/N, 38206 La Laguna, Tenerife, Spain; imartin@ull.edu.es (I.R.M.); rglemus@ull.edu.es (R.G.-L.)

<sup>3</sup> Departamento de Química, Facultad de Ciencias, Instituto Universitario de Materiales y Nanotecnología, Universidad de La Laguna (ULL), Avenida Astrofísico Francisco Sánchez S/N, 38206 La Laguna, Tenerife, Spain; beagher@ull.edu.es (B.G.-H.); jsanchiz@ull.edu.es (J.S.)

<sup>4</sup> Departamento de Ingeniería Industrial, Escuela Superior de Ingeniería y Tecnología, Universidad de La Laguna, Camino San Francisco de Paula S/N, 38206 La Laguna, Tenerife, Spain; bgdiaz@ull.edu.es

\* Correspondence: chdezr@ull.edu.es; Tel.: +34-922318243

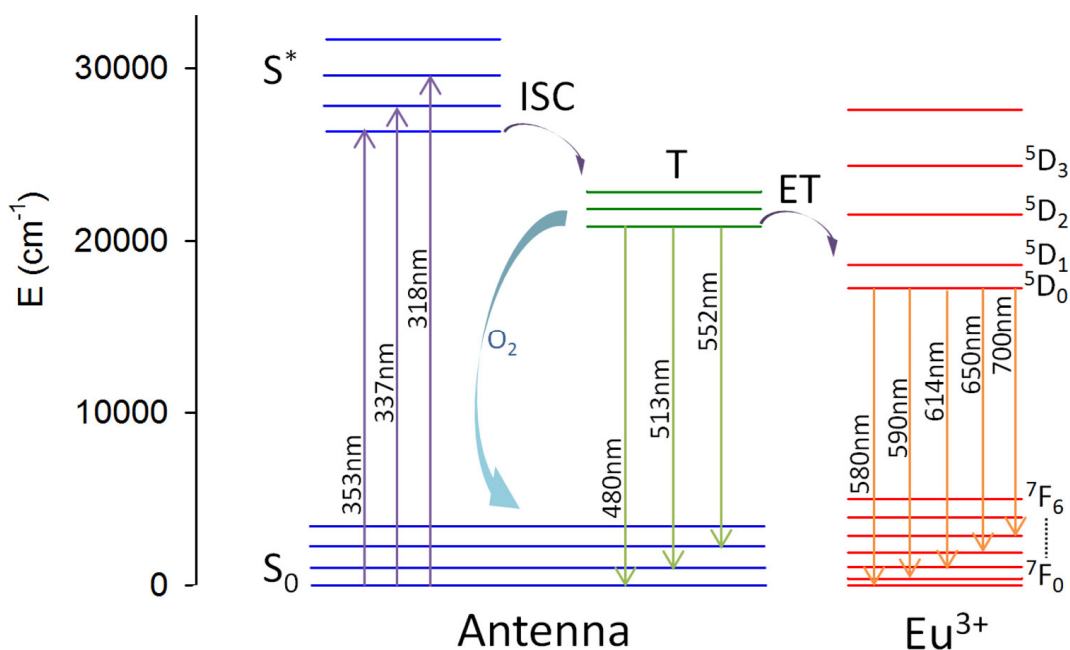

**Figure S8.** Photophysical processes in [Eu<sub>2</sub>(bphen)<sub>2</sub>(bz)<sub>6</sub>] under UV excitation taking to Eu<sup>3+</sup> red emission (antenna effect).

The diagram of Figure S8 shows the excitation of the antenna from the ground state  $S_0$  to the excited  $S^*$  (or  $S_1$ ) single state, followed by intersystem crossing (ISC) to the triplet

state T, (or T<sub>1</sub>). Subsequent quenching of the triplet states by molecular oxygen produces singlet oxygen (O<sub>2</sub>). Finally, energy transference (ET) from the T state of the ligand to the excited state of the Eu<sup>3+</sup> ion is produced.

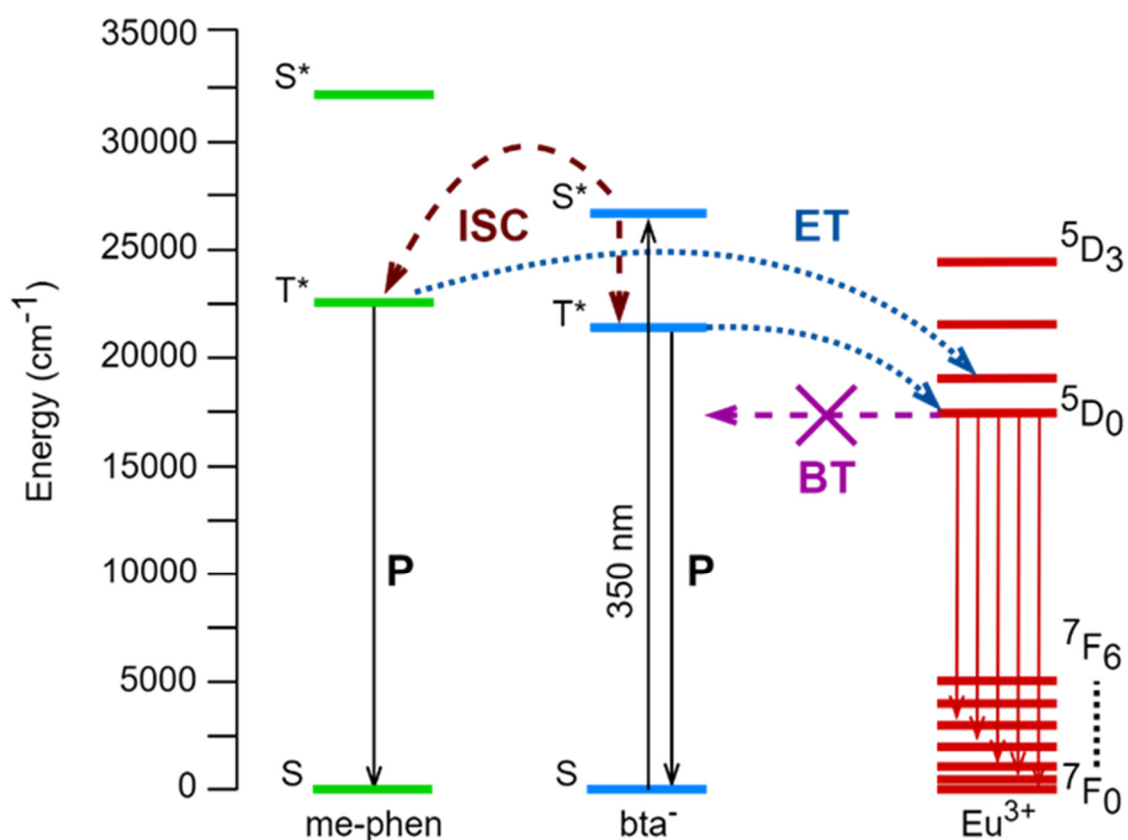

**Figure S9.** Figure 3.17. Scheme of the energy transfer mechanism and photoluminescence process for [Eu(bta)<sub>3</sub>me-phen].

Energies of the states and the transitions that take place in the luminescent down-shifting process of [Eu(bta)<sub>3</sub>me-phen] are shown in Figure S9.

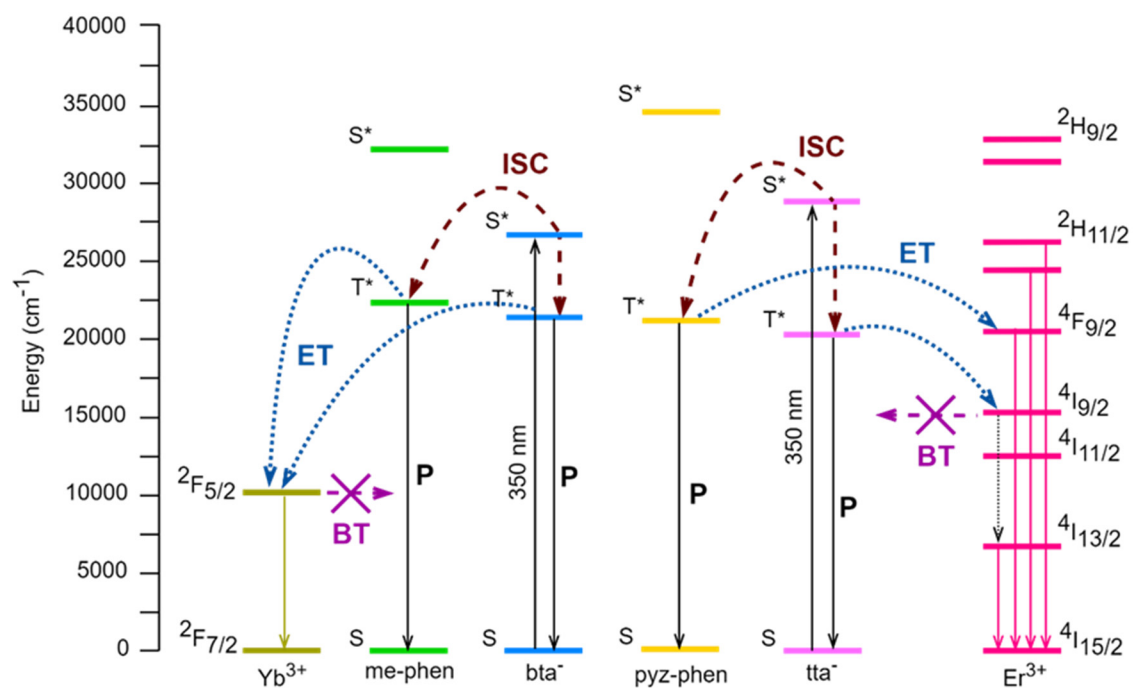

**Figure S10.** Scheme of the energy transfer mechanism and photoluminescence process for Yb(III) and Er(III) complexes.

Figure S10 shows the energy diagram for Yb(III) and Er(III) complexes with the  $\beta$ -diketonates bta<sup>-</sup> and tta<sup>-</sup> and the 1,10-phenanthroline derivatives me-phen and pyz-phen.

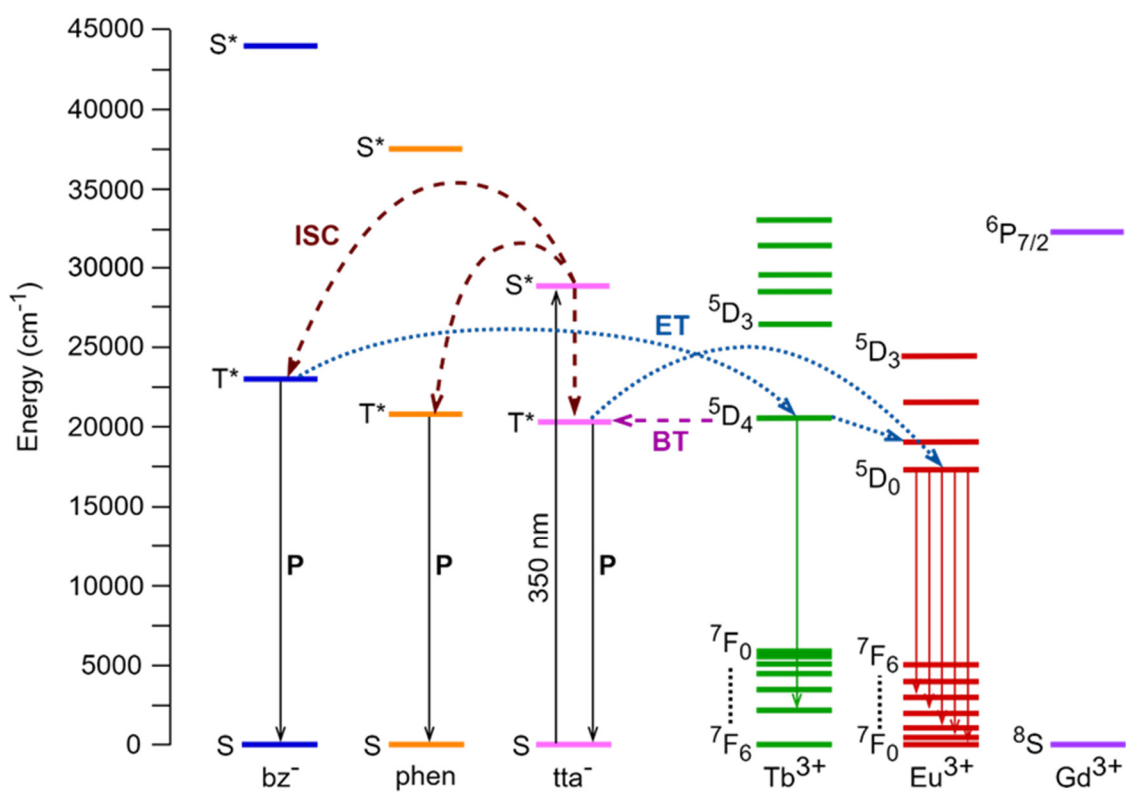

**Figure S11.** Scheme of the energy transfer mechanism and photoluminescence process for [M1M2(bz)<sub>4</sub>(tta)<sub>2</sub>(phen)<sub>2</sub>] series.

The energy diagram for [M1M2(bz)<sub>4</sub>(tta)<sub>2</sub>(phen)<sub>2</sub>] series is shown in figure S11.
